## References

- Cuthbert M: The effect of quinidine and procainamide on the neuromuscular blocking action of suxamethonium. *Brit J Anaesth* 38:775, 1966
- Miller RD, Way WL, Katzung BG: The neuromuscular effects of quinidine. *Proc Soc Exp Biol Med* 129:215, 1968
- Usubiaga JE, Standaert F: The effects of local anesthetics on motor nerve terminals. *J Pharmacol Exp Ther* 159:353, 1968
- Usubiaga JE: Neuromuscular effects of beta-adrenergic blockers and their interaction with skeletal muscle relaxants. *ANESTHESIOLOGY* 29:484, 1968
- Usubiaga JE, Moya F: Neuromuscular effects of six local anaesthetics on anaesthetized subjects. *Canad Anaesth Soc J* 15:56, 1968
- Raines A, Standaert FG: Pre- and postjunctional effects of diphenylhydantoin at the cat soleus neuromuscular junction. *J Pharmacol Exp Ther* 153:361, 1966
- Harrah MD, Way WL, Katzung BG: The interaction of *d*-tubocurarine with antiarrhythmic drugs. *ANESTHESIOLOGY* 33:406, 1970
- Meek WJ, Hathaway HR, Orth OS: The effects of ether, chloroform and cyclopropane on cardiac automaticity. *J Pharmacol Exp Ther* 61:240, 1937
- Hoffman BF, Cranefield PF: The physiological basis of cardiac arrhythmias. *Amer J Med* 37:670, 1964
- Hoffman BF, Singer DH: Appraisal of the effects of catecholamines on cardiac electrical activity. *Ann NY Acad Sci* 139:914, 1967
- Szekeris L: Discussion of a paper by West TC: "Fibrillatory and antifibrillatory drugs" in *Pharmacology of Cardiac Function*. New York, The Macmillan Co. Proc Second International Pharmacological Meeting (Aug. 20-23, 1963), 5:143, 1964
- Papp JG, Szekeris L: The arrhythmogenic action of sympathomimetic amines. *Europ J Pharmacol* 3:4, 1968
- Han J, Moe GK: Nonuniform recovery of excitability in ventricular muscle. *Circ Res* 14:44, 1964
- Dresel PE: Sites of vagal action in adrenaline-induced cardiac arrhythmias. *Canad J Biochem Physiol* 40:1655, 1962
- Katz RL: The effects of alpha and beta adrenergic blocking agents on cyclopropane-catecholamine cardiac arrhythmias. *ANESTHESIOLOGY* 26:289, 1965
- Galindo AH, Davis TB: Succinylcholine and cardiac excitability. *ANESTHESIOLOGY* 23:32, 1962
- Lupprian KC, Churchill-Davidson HC: Effect of suxamethonium on cardiac rhythm. *Brit Med J* 2:1774, 1960
- Williams CH, Deutsch S, Linde HW, *et al.*: Effect of intravenously administered succinylcholine on cardiac rate, rhythm, and arterial blood pressure in anesthetized man. *ANESTHESIOLOGY* 22:947, 1961
- Riley PA, Barila TG, Hughes CW: Ventricular fibrillation in hypothermic dogs as influenced by thiopental, pentobarbital and succinylcholine. *ANESTHESIOLOGY* 17:277, 1956
- Seuffert CW, Urbach KF: Influence of thiopental induction on incidence and types of cardiac arrhythmias during cyclopropane anesthesia. *Anesth Analg* 46:267, 1967
- Strong MJ, Lukhan CP, Keats AS: Cyclopropane-carbon dioxide arrhythmic threshold in patients with cardiovascular disease. *ANESTHESIOLOGY* 29:295, 1968
- Cruber CM: The effects of anesthetic doses of sodium thio-pentobarbital, sodium thio-ethyl and pentothal sodium upon the respiratory system, the heart and blood pressure in experimental animals. *J Pharmacol Exp Ther* 60:143, 1937
- MacCannell KL, Dresel PE: Potentiation of cyclopropane-adrenaline cardiac arrhythmias. *Canad J Physiol Pharmacol* 42:627, 1964
- Standaert FG: The action of *d*-tubocurarine on the motor nerve terminal. *J Pharmacol Exp Ther* 143:181, 1964
- Galindo A: Mode of action of depolarizing neuromuscular blockers. *J Physiol* 211:42P, 1970
- Standaert FG, Levitt B, Roberts J, *et al.*: Antagonism of ventricular arrhythmias induced by digitalis—a neural phenomena. *Europ J Pharmacol* 6:209, 1969

## Obstetrics and Pediatrics

**FETAL ACIDOSIS** Values in fetal scalp, maternal antecubital vein, and umbilical artery and vein blood were measured in 33 patients and fetuses during labor to determine acid-base status and oxygen saturation. Fetal scalp blood pH was the best measurement of fetal well-being during labor. The pH of blood from the umbilical vein was a good indicator at the time of delivery. Fetal oxygen tensions fluctuated rapidly and widely but did not result in fetal acidosis unless the hypoxia was severe and prolonged. (Kerenyi, T. D., and others: *Acid-Base Balance and Oxygen Saturation of Fetal Scalp Blood during Normal and Abnormal Labors, Obstet. Gynec.* 35: 398 (Sept.) 1970.)
